# Supplementary material for: The structure of the Vibrio alginolyticus flagellar filament suggests molecular mechanism for the rotation of sheathed flagella
Source: Research Square preprint supplement (doi:10.21203/rs.3.rs-6983709/v1), 2025-12-16
Supplement: Supplementary file 1 [file 8897fa3f87fb374e57e070bf.xlsx]

## Sheet: Strains
Strain ID	Genotype	Source/Reference
Vibrio alginolyticus NCTC 10675
EM18481	WT, AmpR	Sakazaki et al., 1963
EM18568	∆flrA	This study
EM18569	∆flaB	This study
EM18570	∆flhG	This study
EM18833	∆fliS	This study
EM18834	∆flhG ∆fliS	This study
EM18835	fliD ∆D4 (∆aa206-418)	This study
EM18896	∆fliD	This study
EM18135	∆flaD1	This study
EM18136	∆flaD2	This study
EM18137	∆flaD3	This study
EM18138	∆flaD4	This study
EM18139	∆flaD5	This study
Vibrio cholerae V52
EM16870	∆vasK (T6SS negative), StrepR	Pukatzki et al., 2006
EM18273	∆vasK ∆flrA	This study
EM18356	∆vasK ∆flhG	This study
EM18564	∆vasK fliD ∆D4 (∆aa207-418)	This study
EM18565	∆vasK ∆flaA	This study
EM18897	∆vasK ∆fliD	This study
Escherichia coli
TH12219	CC118 λ-pir+	Lab collection
EM18188	CC118 λ-pir+ / pEM18188 (pRE112-∆flrA (from Vibrio cholerae), CmR)	This study
EM18320	CC118 λ-pir+ / pEM18320 (pRE112-∆flhG (from Vibrio cholerae), CmR)	This study
TH6708	DH5ɑ λ-pir+	Lab collection
EM18524	DH5ɑ λ-pir+ / pEM18524 (pRE112-∆flrA (from Vibrio alginolyticus), CmR)	This study
EM18541	DH5ɑ λ-pir+ / pEM18541 (pRE112-∆flaA (from Vibrio cholerae), CmR)	This study
EM18542	DH5ɑ λ-pir+ / pEM18542 (pRE112-fliD ∆D4 (from Vibrio cholerae), CmR)	This study
EM18543	DH5ɑ λ-pir+ / pEM18543 (pRE112-∆flaB (from Vibrio alginolyticus), CmR)	This study
EM18544	DH5ɑ λ-pir+ / pEM18544 (pRE112-∆flhG (from Vibrio alginolyticus), CmR)	This study
EM18734	DH5ɑ λ-pir+ / pEM18734 (pRE112-∆fliS (from Vibrio alginolyticus), CmR)	This study
EM18735	DH5ɑ λ-pir+ / pEM18735 (pRE112-fliD ∆D4 (from Vibrio alginolyticus), CmR)	This study
EM18840	DH5ɑ λ-pir+ / pEM18840 (pRE112-∆fliD (from Vibrio cholerae), CmR)	This study
EM18841	DH5ɑ λ-pir+ / pEM18841 (pRE112-∆fliD (from Vibrio alginolyticus), CmR)	This study
EM19125	DH5ɑ λ-pir+ / pEM19125 (pRE112-∆flaD1 (from Vibrio alginolyticus), CmR)	This study
EM19126	DH5ɑ λ-pir+ / pEM19126 (pRE112-∆flaD2 (from Vibrio alginolyticus), CmR)	This study
EM19127	DH5ɑ λ-pir+ / pEM19127 (pRE112-∆flaD3 (from Vibrio alginolyticus), CmR)	This study
EM19128	DH5ɑ λ-pir+ / pEM19128 (pRE112-∆flaD4 (from Vibrio alginolyticus), CmR)	This study
EM19129	DH5ɑ λ-pir+ / pEM19129 (pRE112-∆flaD5 (from Vibrio alginolyticus), CmR)	This study
TH4042	SM10 λ-pir+	Lab collection
EM18154	SM10 λ-pir+ / pEM18188 (pRE112-∆flrA (from Vibrio cholerae), CmR)	This study
EM18322	SM10 λ-pir+ / pEM18320 (pRE112-∆flhG (from Vibrio cholerae), CmR)	This study
EM18534	SM10 λ-pir+ / pEM18524 (pRE112-∆flrA (from Vibrio alginolyticus), CmR)	This study
EM18546	SM10λ-pir+ / pEM18541 (pRE112-∆flaA (from Vibrio cholerae), CmR)	This study
EM18547	SM10 λ-pir+ / pEM18542 (pRE112-fliD ∆D4 (from Vibrio cholerae), CmR)	This study
EM18548	SM10 λ-pir+ / pEM18543 (pRE112-∆flaB (from Vibrio alginolyticus), CmR)	This study
EM18549	SM10 λ-pir+ / pEM18544 (pRE112-∆flhG (from Vibrio alginolyticus), CmR)	This study
EM18738	SM10 λ-pir+ / pEM18734 (pRE112-∆fliS (from Vibrio alginolyticus), CmR)	This study
EM18739	SM10 λ-pir+ / pEM18735 (pRE112-fliD ∆D4 (from Vibrio alginolyticus), CmR)	This study
EM18842	SM10 λ-pir+ / pEM18840 (pRE112-∆fliD (from Vibrio cholerae), CmR)	This study
EM18843	SM10 λ-pir+ / pEM18841 (pRE112-∆fliD (from Vibrio alginolyticus), CmR)	This study
EM19130	SM10 λ-pir+ / pEM19125 (pRE112-∆flaD1 (from Vibrio alginolyticus), CmR)	This study
EM19131	SM10 λ-pir+ / pEM19126 (pRE112-∆flaD2 (from Vibrio alginolyticus), CmR)	This study
EM19132	SM10 λ-pir+ / pEM19127 (pRE112-∆flaD3 (from Vibrio alginolyticus), CmR)	This study
EM19133	SM10 λ-pir+ / pEM19128 (pRE112-∆flaD4 (from Vibrio alginolyticus), CmR)	This study
EM19134	SM10 λ-pir+ / pEM19129 (pRE112-∆flaD5 (from Vibrio alginolyticus), CmR)	This study

## Sheet: Plasmids
Plasmid	Description	Source/Reference
pRE112	pGP704, sacB, CmR	Lab collection
pEM18188	pRE112-∆flrA (from Vibrio cholerae), CmR	This study
pEM18320	pRE112-∆flhG (from Vibrio cholerae), CmR	This study
pEM18524	pRE112-∆flrA (from Vibrio alginolyticus), CmR	This study
pEM18541	pRE112-∆flaA (from Vibrio cholerae), CmR	This study
pEM18542	pRE112-fliD ∆D4 (from Vibrio cholerae), CmR	This study
pEM18543	pRE112-∆flaB (from Vibrio alginolyticus), CmR	This study
pEM18544	pRE112-∆flhG (from Vibrio alginolyticus), CmR	This study
pEM18734	pRE112-∆fliS (from Vibrio alginolyticus), CmR	This study
pEM18735	pRE112-fliD ∆D4 (from Vibrio alginolyticus), CmR	This study
pEM18840	pRE112-∆fliD (from Vibrio cholerae), CmR	This study
pEM18841	pRE112-∆fliD (from Vibrio alginolyticus), CmR	This study
pEM19125	pRE112-∆flaD1 (from Vibrio alginolyticus), CmR	This study
pEM19126	pRE112-∆flaD2 (from Vibrio alginolyticus), CmR	This study
pEM19127	pRE112-∆flaD3 (from Vibrio alginolyticus), CmR	This study
pEM19128	pRE112-∆flaD4 (from Vibrio alginolyticus), CmR	This study
pEM19129	pRE112-∆flaD5 (from Vibrio alginolyticus), CmR	This study

## Sheet: Oligonucleotides
Primer Name	Sequence	Source
CAT-C1	TTATACGCAAGGCGACAAGG	Lab Collection
pRE112 seq fw	GATTTTCTGGTGCGTACCGG	This study
pRE112 linearize fw	CTCTAGAAGAAGCTTGGGATCG	This study
pRE112 linearize rev	AGCTCTCCCGGGAATTCA	This study
DflrA clean fw1_VIBCH	GTGTAAGTGAACTGCATGAATTCCCGGGAGAGCTGATATCATCATTAGCCTAC	This study
DflrA clean rev1_VIBCH	CCCATCCACTATAAACTAACACGCTAAACTCTGCATAGGT	This study
DflrA clean fw2_VIBCH	TGTTAGTTTATAGTGGATGGGGAAGAGCCGCAGGAGTTTG	This study
DflrA clean rev2_VIBCH	GTGATAGGGCCCGATCCCAAGCTTCTTCTAGAGCTTCTGGGTTGGCTTCACG	This study
DflrA colony PCR fw_VIBCH	GTAAGGCGGCAATGCAGC	This study
DflrA colony PCR rev_VIBCH	GCAATCTGGATCACGCTG	This study
pRE112-DflrA up fw_VIBAL	CATGAATTCCCGGGAGAGCTGGTTAAGCAGGATGCAGAGTG	This study
DflrA up rev_VIBAL	CGCATTTTTTCAATTACAAGCAGCTTTGCCAAAC	This study
DflrA down fw_VIBAL	GCTGCTTGTAATTGAAAAAATGCGTAAGTACAAC	This study
pRE112-DflrA down rev_VIBAL	CGATCCCAAGCTTCTTCTAGAGCTCAGTTTGTTCTTCTTC	This study
DflrA colony fw_VIBAL	GGTCGATATCAGGGAACGGTTATTGC	This study
DflrA colony rev_VIBAL	CGGATGCAATGGCGTTCGC	This study
DflhG pRE112 fw_VIBCH	GTGTAAGTGAACTGCATGAATTCCCGGGAGAGCTGATGTCCTGTAAGAGTTG	This study
DflhG upstream rev_VIBCH	CCCATCCACTATAAACTAACATTGGTCATATATCATTTTGTTTG	This study
DflhG downstream fw_VIBCH	TGTTAGTTTATAGTGGATGGGCGGTCAGAAACAGTAGGGGAAC	This study
DflhG pRE112 rev_VIBCH	GTGATAGGGCCCGATCCCAAGCTTCTTCTAGAGCACCGAGATCCTCTATCC	This study
DflhG colony PCR fw_VIBCH	CGTCGCATTGGTGACCAC	This study
DflhG colony PCR rev_VIBCH	CAACGAGTGCTTTACGGAAAG	This study
DflhG down rev_VIBAL	CGATCCCAAGCTTCTTCTAGAGATCCGCCGGTGAAATCAC	This study
DflhG down fw_VIBAL	AATCGTACCGAATTCGCAGAG	This study
DflhG up rev_VIBAL	CTCTGCGAATTCGGTACGATTTGCTTGATCGTGTATCATATTCTC	This study
DflhG up fw_VIBAL	TGAATTCCCGGGAGAGCTGTTGTCCCGTAAGAGTTGCT	This study
DflhG colony fw_VIBAL	CCCCTTTGAATGGGTTGCTG	This study
DflhG colony rev_VIBAL	GGTGCACATGAGCAACTCTC	This study
DflaA up fw_VIBCH	GAACTGCATGAATTCCCGGGAGAGCTCGAAGATTTCAAAATCAGC	This study
DflaA up rev_VIBCH	GAGTTTGGCAACGACACGTTGGTATTTACG	This study
DflaA down fw_VIBCH	GTAAATACCAACGTGTCGTTGCCAAACTCTGCAATC	This study
DflaA down rev_VIBCH	GGCCCGATCCCAAGCTTCTTCTAGAGCCATAGTGGTATCTCCTATTG	This study
DflaA fw_VIBCH	CAAACTGCATCAGTTAGTTGAAG	This study
DflaA rev_VIBCH	GTTGTGCTGTCATTGCTGAC	This study
DflaB up fw_VIBAL	GAACTGCATGAATTCCCGGGAGAGCTCGAAGGCAAAAAAGTAACG	This study
DflaB up rev_VIBAL	GCGCTGCAGATGGAGAAGAAACGTTAGTATTAACGTTAATC	This study
DflaB down fw_ViBAL	CTAACGTTTCTTCTCCATCTGCAGCGCTAAGCTTG	This study
DflaB down rev_ViBAL	GGCCCGATCCCAAGCTTCTTCTAGAGCCATGCCGCCAGACATCCC	This study
DflaB fw_VIBAL	GGGCGAGGTCGAGTTTTCAGG	This study
DflaB rev_VIBAL	GTACGCGTTCGGCATCCAC	This study
fliD DD4 up fw_VIBCH	GAACTGCATGAATTCCCGGGAGAGCTGGTCAGCAAAATTGTCAGTG	This study
fliD DD4 up rev_VIBCH	CGTAGCCATCGAGGGTTTTGTATTCGAGTTG	This study
fliD DD4 down fw_VIBCH	CTCGAATACAAAACCCTCGATGGCTACGGCGGCATG	This study
fliD DD4 down rev_VIBCH	GGCCCGATCCCAAGCTTCTTCTAGAGGTCTGTTCATTCAAGCTC	This study
fliD DD4 fw_VIBCH	GAGGTGATTGAATGAGTTTAGG	This study
fliD DD4 rev_VIBCH	GGGTCCGTTTTTCCAAAC	This study
pRE-DfliS down rev_VIBAL	GTGATAGGGCCCGATCCCAAGCTTCTTCTAGAGCAGGCAAAGGAAAACGGC	This study
pRE-DfliS down fw_VIBAL	GCATACAAAAAGCATAATCTTACCGCTGCTGAAG	This study
pRE-DfliS up rev_VIBAL	GCGGTAAGATTATGCTTTTTGTATGCTTGCAAAGAAC	This study
pRE-DfliS up fw_VIBAL	GGTGTAAGTGAACTGCATGAATTCCCGGGAGAGCTCCAGTTGAACAATAACTTCAAC	This study
DfliS colony fw_VIBAL	GGCAGCTCTAGTTCACCAAC	This study
DfliS colony rev_VIBAL	CACGTCAAGGCACCCTAG	This study
fliD DD4 up fw_VIBAL	GGTGTAAGTGAACTGCATGAATTCCCGGGAGAGCTCAACAGCGGGTTGTTGAC	This study
fliD DD4 up rev_VIBAL	CCCAAGGTATTCTGTTTGGTATTCGAAATATTTAAGAGGG	This study
fliD DD4 down fw_VIBAL	CGAATACCAAACAGAATACCTTGGGATGACAGAAG	This study
fliD DD4 down rev_VIBAL	GTGATAGGGCCCGATCCCAAGCTTCTTCTAGAGCGTCACTCAAACGGTAGTTTTGTTC	This study
fliD DD4 fw_VIBAL	CTTTCCATGCGGCGATCTAATG	This study
fliD DD4 rev_VIBAL	GGTATTGCGTCGCCTAGC	This study
DfliD down rev_VIBCH	GTGATAGGGCCCGATCCCAAGCTTCTTCTAGAGGATTTTTGGCGATGTCGCCAC	This study
DfliD down fw_VIBCH	GATGAATACTTTAGCGGGCATGATGAACGC	This study
DfliD up rev_VIBCH	CATCATGCCCGCTAAAGTATTCATCCCCATCGGG	This study
DfliD up fw_VIBCH	GTGTAAGTGAACTGCATGAATTCCCGGGAGAGCTCTGAGCTTATTGGGATAACCC	This study
DfliD colony fw_VIBCH	GTTGACCATAAAGTCATACAG	This study
DfliD colony rev_VIBCH	GACGAAGGCGCAAATATTGC	This study
DfliD down rev_VIBAL	GTGATAGGGCCCGATCCCAAGCTTCTTCTAGAGGTTTGAAGCAATATCACCACCGTCATC	This study
DfliD down fw_VIBAL	GATGTCTGGCCAGTTGGGCGCTTTGATG	This study
DfliD up rev_VIBAL	CAAAGCGCCCAACTGGCCAGACATCCCCAAAGG	This study
DfliD up fw_VIBAL	GTGTAAGTGAACTGCATGAATTCCCGGGAGAGCTCTAAGCTTGTTGGGCTAAGTGG	This study
DfliD colony fw_VIBAL	GCGTGATCATAAACTCATAC	This study
DfliD colony rev_VIBAL	CTTCAGCAAGCAAGTACTTC	This study
DflaD_1 up fw_VIBAL	GGTGTAAGTGAACTGCATGAATTCCCGGGAGAGCTGTCTCTGGCAAAAGCGAAG	This study
DflaD_1 up rev_VIBAL	AGTTTGGCAAGGAGACGTTAGTACTAACTGTTACAG	This study
DflaD_1 down fw_VIBAL	TAACGTCTCCTTGCCAAACTCTGCAATGTC	This study
DflaD_1 down rev_VIBAL	GTGATAGGGCCCGATCCCAAGCTTCTTCTAGAGCATCTTTTGCGCTGTTGATTTTG	This study
DflaD_1 colony fw_VIBAL	CAAGAGCAAAATCATGAAGAC	This study
DflaD_1 colony rev_VIBAL	CGCATACGTTGAAGAATG	This study
DflaD_2 up fw_VIBAL	GGTGTAAGTGAACTGCATGAATTCCCGGGAGAGCTGCCAAACTCTGCAATGTCAC	This study
DflaD_2 up rev_VIBAL	AGTTAGGCGCTGATACGTTAGTGTTTACATTCACTG	This study
DflaD_2 down fw_VIBAL	CTAACGTATCAGCGCCTAACTCAGCGCTAAG	This study
DflaD_2 down rev_VIBAL	AAGTGATAGGGCCCGATCCCAAGCTTCTTCTAGAGGATTGAATTAGCGTTCGCGCC	This study
DflaD_2 colony fw_VIBAL	CATCGATTCTTGCTCAAGCG	This study
DflaD_2 colony rev_VIBAL	GATATGGCTACGCATGTTACG	This study
DflaD_3 up fw_VIBAL	GGTGTAAGTGAACTGCATGAATTCCCGGGAGAGCTCAAACTGACCTAGTGAAAGCG	This study
DflaD_3 up rev_VIBAL	GAACTCGGCCTCGCAGAAACATTGGAATTTAAAGAG	This study
DflaD_3 down fw_VIBAL	CAATGTTTCTGCGAGGCCGAGTTCGGCACTTG	This study
DflaD_3 down rev_VIBAL	AAGTGATAGGGCCCGATCCCAAGCTTCTTCTAGAGCAGCGCTGACGCTGGTGC	This study
DflaD_3 colony fw_VIBAL	CGAAGAGCTTGCGACTTAC	This study
DflaD_3 colony rev_VIBAL	GGGTCTGTTTGACAAACTTAAGAAG	This study
DflaD_4 up fw_VIBAL	GGTGTAAGTGAACTGCATGAATTCCCGGGAGAGCTGATATTAGCACGGTCGGTGGC	This study
DflaD_4 up rev_VIBAL	GAGTTTGGCGCTGATACGTTAGTGTTTACATTCACTG	This study
DflaD_4 down fw_VIBAL	CACTAACGTATCAGCGCCAAACTCAGCGCTAAG	This study
DflaD_4 down rev_VIBAL	AAGTGATAGGGCCCGATCCCAAGCTTCTTCTAGAGCGAAAGATCACGCATACGTTGTAGG	This study
DflaD_4 colony fw_VIBAL	GAGTTAGAGCCGTTCGCC	This study
DflaD_4 colony rev_VIBAL	CTTGGCAAGTATGTCACCG	This study
DflaD_5 up fw_VIBAL	GGTGTAAGTGAACTGCATGAATTCCCGGGAGAGCTGGCTCTAGTAAAAGAGGGCC	This study
DflaD_5 up rev_VIBAL	GGTTTGGCGCTGCAACATTGGTATTAACGG	This study
DflaD_5 down fw_VIBAL	CCAATGTTGCAGCGCCAAACCTAGCATTGAC	This study
DflaD_5 down rev_VIBAL	AAGTGATAGGGCCCGATCCCAAGCTTCTTCTAGAGCCGTTTGCTGATTGCAGAGACAAG	This study
DflaD_5 colony fw_VIBAL	CACTGCTTCGCCGTTATCC	This study
DflaD_5 colony rev_VIBAL	GGCACAGAAAACCCGAAAGG	This study
