# Supplementary material for: The structure of the Vibrio alginolyticus flagellar filament suggests molecular mechanism for the rotation of sheathed flagella
Source: Research Square preprint supplement (doi:10.21203/rs.3.rs-6983709/v1), 2025-12-16
Supplement: Supplementary file 2 [file d153899ad64d3b52d382ad36.docx]

**Table S1: Cryo-EM data collection, refinement and validation statistics**

|  | **#1 Sheathed filament**  **(EMD-53917)**  **(PDB 9RCD)** | **#2 Unsheathed filament**  **(EMD-53912)**  **(PDB 9RCB)** |
| --- | --- | --- |
| **Data collection and processing** |  |  |
| Camera | K3 | |
| Magnification | 81,000 | |
| Voltage (kV) | 300 | |
| Electron exposure (e–/ Å2) | 40 | |
| Defocus range (μm) | -0.9 to -2.7 | |
| Pixel size (Å) | 1.1 | |
| Symmetry imposed | C1 | C1 |
| Initial particle images (no.) | 76,818 | 443,577 |
| Final particle images (no.) | 72,779 | 439,378 |
| FSC threshold | 0.143 | 0.143 |
| Map resolution (Å) | 3.6 | 3.16 |
|  |  |  |
| **Refinement** |  |  |
| Initial model used (PDB code) | AlphaFold DB | AlphaFold DB |
| Map-to-Model resolution (Å) |  |  |
| Masked | 4.3 | 3.2 |
| Unmasked | 4.7 | 3.3 |
| Model Vs Data CC |  |  |
| Mask | 0.76 | 0.75 |
| Box | 0.56 | 0.63 |
| Local resolution range (Å) | 3.6 to 10.0 | 3.2 to 4.5 |
| Map sharpening B factor (Å2) | -17.5 | -73.5 |
| Number of chains | 33 | 55 |
| Model composition  Non-hydrogen atoms  Protein residues | 123112  16544 | 154330  20735 |
| B factors (Å2)  Protein | 159.3 | 134.25 |
| R.m.s. deviations  Bond lengths (Å)  Bond angles (°) | 0.006  1.033 | 0.006  0.917 |
| Validation  MolProbity score  Clashscore  Poor rotamers (%) | 1.94  18.69  1.48 | 1.84  15.89  1.52 |
| Ramachandran plot  Favored (%)  Allowed (%)  Disallowed (%) | 97.80  2.18  0.02 | 98.60  1.40  0.00 |

**Table S2: The sequence identity matrix of flagellin homologs in *Vibrio alginolyticus***

|  | FlaD3 | FlaD5 | FlaD1 | FlaB | FlaD2 | FlaD4 |
| --- | --- | --- | --- | --- | --- | --- |
| FlaD3 | 100.0 | 47.3 | 44.4 | 50.9 | 52.1 | 52.1 |
| FlaD5 | 47.3 | 100.0 | 60.9 | 65.2 | 67.2 | 67.2 |
| FlaD1 | 44.4 | 60.9 | 100.0 | 64.9 | 66.8 | 66.8 |
| FlaB | 50.9 | 65.2 | 64.9 | 100.0 | 78.5 | 78.2 |
| FlaD2 | 52.1 | 67.2 | 66.8 | 78.5 | 100.0 | 99.7 |
| FlaD4 | 52.1 | 67.2 | 66.8 | 78.2 | 99.7 | 100.0 |
